# Supplementary material
Source: PubMed Central journal article supplement (PMC3019278)
Supplement: NIHMS239846-supplement-Supplementary_table.pdf [file NIHMS239846-supplement-Supplementary_table.pdf]

**Supplementary Table 1 : Oligonucleotide Probes Used for EMSAs**

| Probe       | Sequence                                                                                         | 5' nucleotide relative to TATA |
|-------------|--------------------------------------------------------------------------------------------------|--------------------------------|
| G5          | 5' ttccttt <b>CTATCA</b> gccccag <sup>3'</sup><br>3' aaggaaa <b>GATAGT</b> accccag <sup>5'</sup> | -2953                          |
| G6          | agacccc <b>AGATAA</b> ttaagga<br>tctgggg <b>TCTATT</b> aattcct                                   | -2678                          |
| G7          | gtcactt <b>CTATCT</b> gagaagc<br>cagtgaa <b>GATAGA</b> ctcttcg                                   | -2221                          |
| G8          | tatgccg <b>CTATCA</b> tctagat<br>atacggc <b>GATAGT</b> agatcta                                   | -1650                          |
| G9          | tgatctc <b>AGATAG</b> ctcaggc<br>actagag <b>TCTATC</b> gagtccg                                   | -1542                          |
| G10         | ttgtcct <b>TTATCA</b> atgtcat<br>aacagga <b>AATAGT</b> tacagta                                   | -1153                          |
| G11         | gcttttg <b>CTATCA</b> tactcaa<br>cgaaaac <b>GATAGT</b> atgagtt                                   | -567                           |
| $\alpha$ D3 | tccgata <b>AGATAA</b> ggccggg<br>agcctat <b>TCTATT</b> ccggccc                                   |                                |
